# Supplementary material
Source: PubMed Central journal article supplement (PMC6121707)
Supplement: NIHMS927469-supplement-1.pdf [file NIHMS927469-supplement-1.pdf]

Supplementary Material for

# **Influence of Diabetes on the Foreign Body Response to Nitric Oxide-Releasing Implants**

Robert J. Soto, Elizabeth P. Merricks, Dwight A. Bellinger, Timothy C. Nichols, and Mark H. Schoenfisch\*

Department of Chemistry, University of North Carolina at Chapel Hill, Chapel Hill, North Carolina 27599, United States

\*To whom correspondence should be addressed: schoenfisch@unc.edu

- I. Supplementary Experimental Information
  - 1. Synthesis of *N*-diazoniumdiolate-modified mesoporous silica nanoparticles.
  - 2. Synthesis of *S*-nitrosothiol-modified mesoporous silica nanoparticles.
- II. Supplementary Figures
  - 1. Graph of total NO released versus time for the NO-releasing implants.
  - 2. Post-prandial blood glucose values before and after diabetes induction.
  - 3. Inflammatory cell densities at control implants.
  - 4. Photomicrographs of H&E and MT stained tissues in uninjured regions.
  - 5. Photomicrographs of anti-CD31 and hematoxylin stained tissues in uninjured regions.
- III. Supplementary Tables
  - 1. Characterization of nitric oxide-releasing silica particles.

### *Synthesis of N-diazeniumdiolate-modified mesoporous silica nanoparticles*

Mesoporous silica nanoparticles (MSNs) functionalized with *N*-diazeniumdiolate NO donors were synthesized using a variant of the Stöber method, as reported previously [40]. Bare mesoporous silica particles were first prepared by adding TEOS (1.395 mL) to a solution of water (162 mL), EtOH (175 mL), NH<sub>4</sub>OH (11.8 mL), and CTAB (280 mg). The silicate solution was allowed to stir for 2 h until MSN formation was complete, after which DET (1.31 mL) was added dropwise over 1 min to initiate cation exchange between CTAB and the aminosilanes. The reaction was stirred overnight (~18 h). Secondary amine-modified particles were subsequently collected via centrifugation (6540g, 4 °C, 5 min). Residual CTAB in the MSN mesopores was removed via ion exchange with H<sup>+</sup> ions by sonicating the particles in an ethanolic HCl solution (9:1 v/v EtOH:HCl; 3×20 min). The amine-modified MSNs were then washed with EtOH (2×) and dried under reduced pressure.

Secondary amines on the MSNs were converted to *N*-diazeniumdiolate NO donors by reaction with gaseous NO. The DET particles were initially dispersed in 9:1 (v/v) DMF:MeOH at 5 mg mL<sup>-1</sup> prior to adding 5.4 M methanolic NaOMe (5 μL per 3 mg MSN) as a catalyst for NO donor formation. Glass vials containing the particle solutions were equipped with stir bars, placed in a stainless-steel Parr hydrogenation vessel, and connected to an in-house NO reactor. The Parr bottle was flushed with Ar (3×short, 3×10 min) to remove oxygen from the reaction solution prior to pressurizing the vessel with pure (>99.5%) NO gas (10 bar) for 3 d. Of note, the NO gas was scrubbed over solid potassium hydroxide for at least 4 h prior to the *N*-diazeniumdiolate formation reaction. After 3 d the NO gas was vented and the vessel again flushed with Ar. The NO donor-modified particles were collected via centrifugation, washed with EtOH (3×), and dried under reduced pressure. The resulting NO-releasing particles were stored

in a vacuum-sealed Mylar bag at -20 °C until further use. Control (i.e., non-NO-releasing) DET MSNs were treated similarly with NaOMe but without the *N*-diazoniumdiolate formation process. Characterization of the NO-releasing DET particles is provided as supplementary data (Table S1).

#### *Synthesis of S-nitrosothiol-modified mesoporous silica nanoparticles*

Thiol-based MSNs were synthesized using a mercaptosilane/alkoxysilane co-condensation method adapted from reported procedures for nonporous, thiol-modified particles [39]. A silane precursor solution was initially prepared by mixing MPTMS (1.32 mL) and TEOS (1.19 mL) in a glass vial. The silane mixture (2.28 mL) was added to a stirring solution of water (210 mL), EtOH (84 mL), NH<sub>4</sub>OH (9.6 mL), and CTAB (240 mg). The reaction was allowed to proceed for 2 h. The thiol-modified particles were collected and purified using the same washing and CTAB removal steps described above for the DET MSNs. *S*-nitrosothiol (RSNO) NO donors were formed on the thiol groups in a subsequent nitrosation step. The MPTMS MSNs (200 mg) were dispersed in a mixture of MeOH (4.00 mL) and 5 M HCl (2.00 mL) and stirred on ice. A solution (2.00 mL) of sodium nitrite (2.27 M) and diethylenetriaminepentaacetic acid (DTPA; 500 μM) in water was added dropwise to particle dispersion and stirred on ice for 1 h. The MSNs were collected via centrifugation, washed with cold MeOH (3×), and dried under reduced pressure. The RSNO-modified particles were used immediately thereafter. Characterization of the NO-releasing RSNO particles is provided as supplementary data (Table S1).

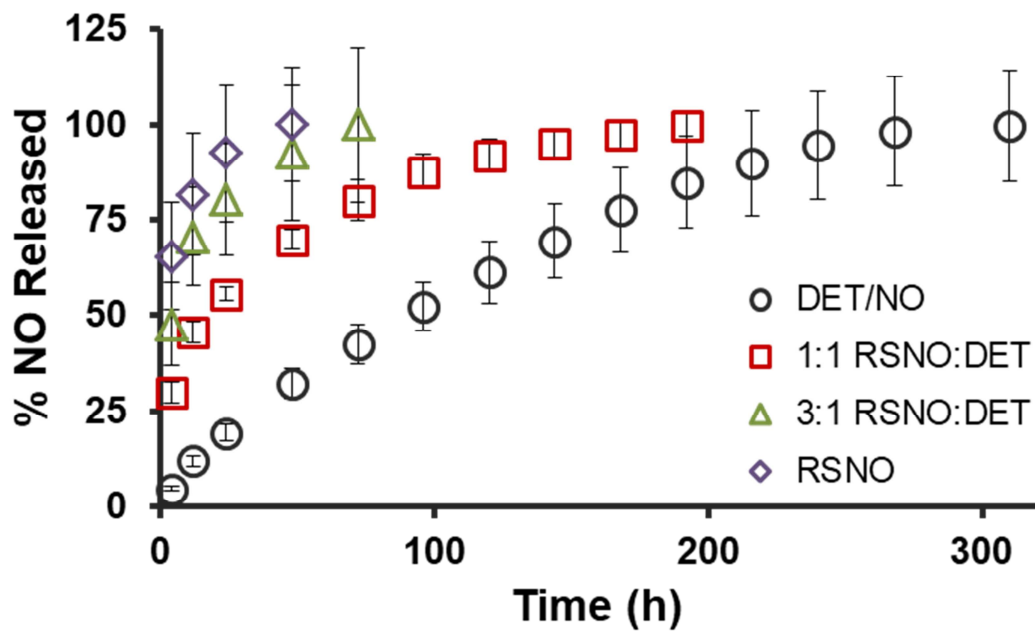

**Figure S1.** Graph of temporal NO release expressed as a percentage of the total NO released. Total amounts of NO released were calculated by integration of the NO flux vs. time curves to be  $1.37 \pm 0.20$  (RSNO),  $1.44 \pm 0.29$  (3:1 RSNO:DET),  $5.55 \pm 0.12$  (1:1 RSNO:DET), and  $2.72 \pm 0.25$  (DET/NO)  $\mu\text{mol NO per cm}^2$  implant surface area.

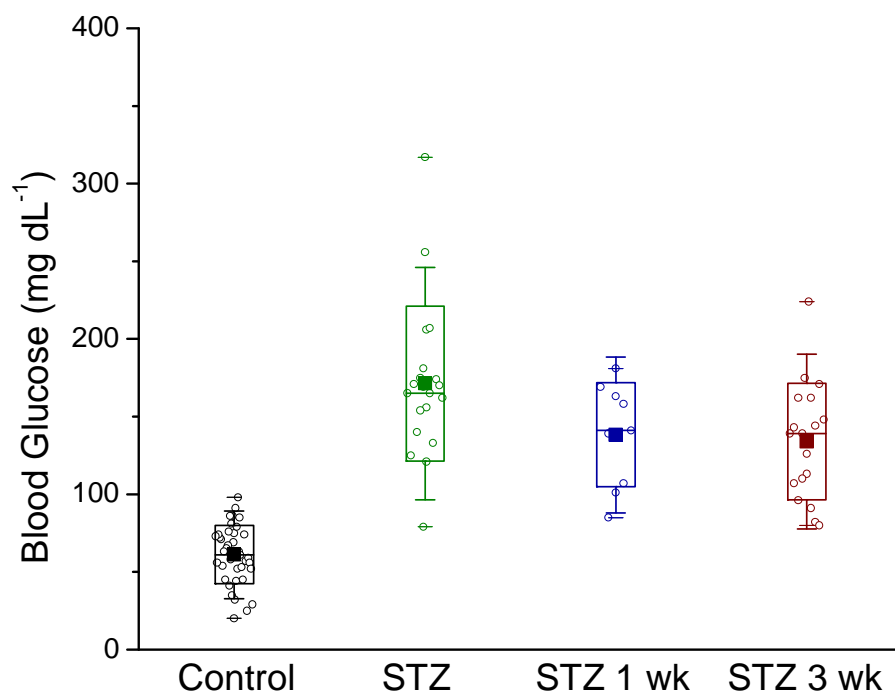

**Figure S2.** Box and whisker plot of post-prandial blood glucose values determined by a Freestyle Lite glucometer before and after STZ administration. Blood glucose values approximately ~1 (1 wk) and 3 (3 wk) weeks after implantation are also shown.

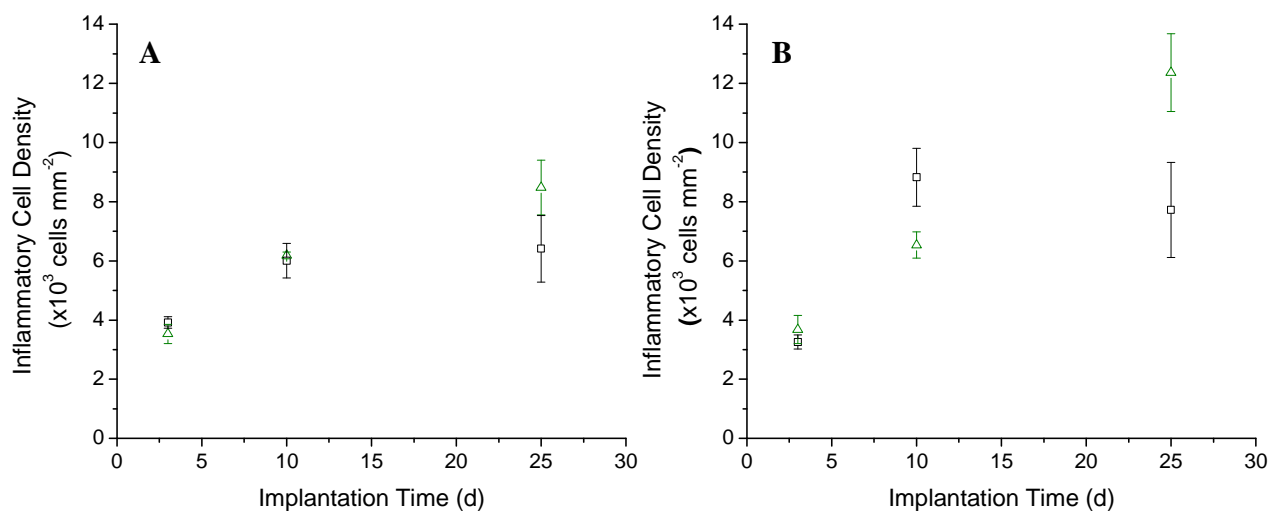

**Figure S3.** Inflammatory cell densities at RSNO control (A) and DET control (B) implants in the healthy (black square) and STZ-treated pig models (green triangle). Inflammatory cell densities are expressed as the average value  $\pm$  standard error of the mean.

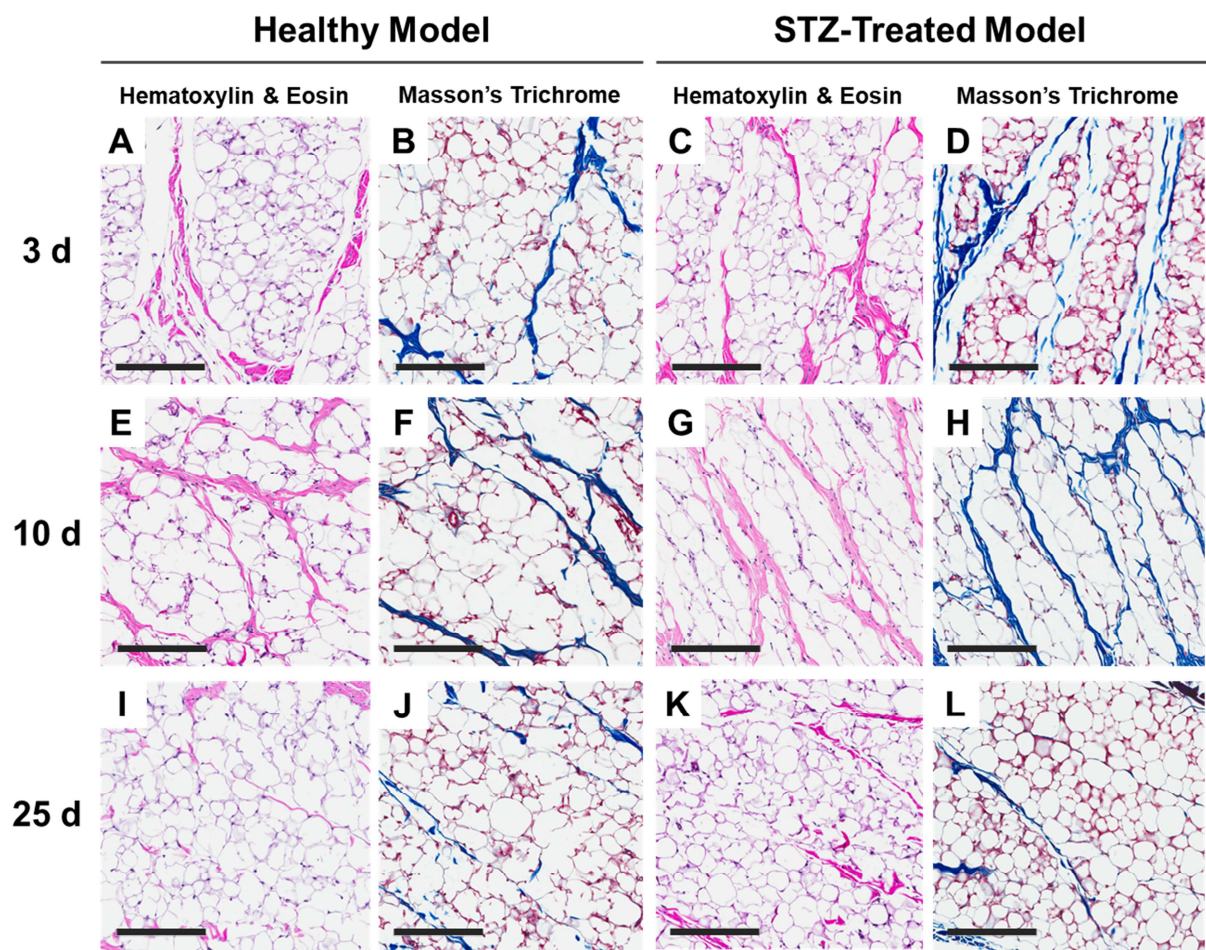

**Figure S4.** Photomicrographs of H&E and MT stained tissues >10 mm away from DET control implants, representative of unperturbed subcutaneous tissue. The scale bar at the bottom-left corner of each image represents a distance of 200  $\mu$ m.

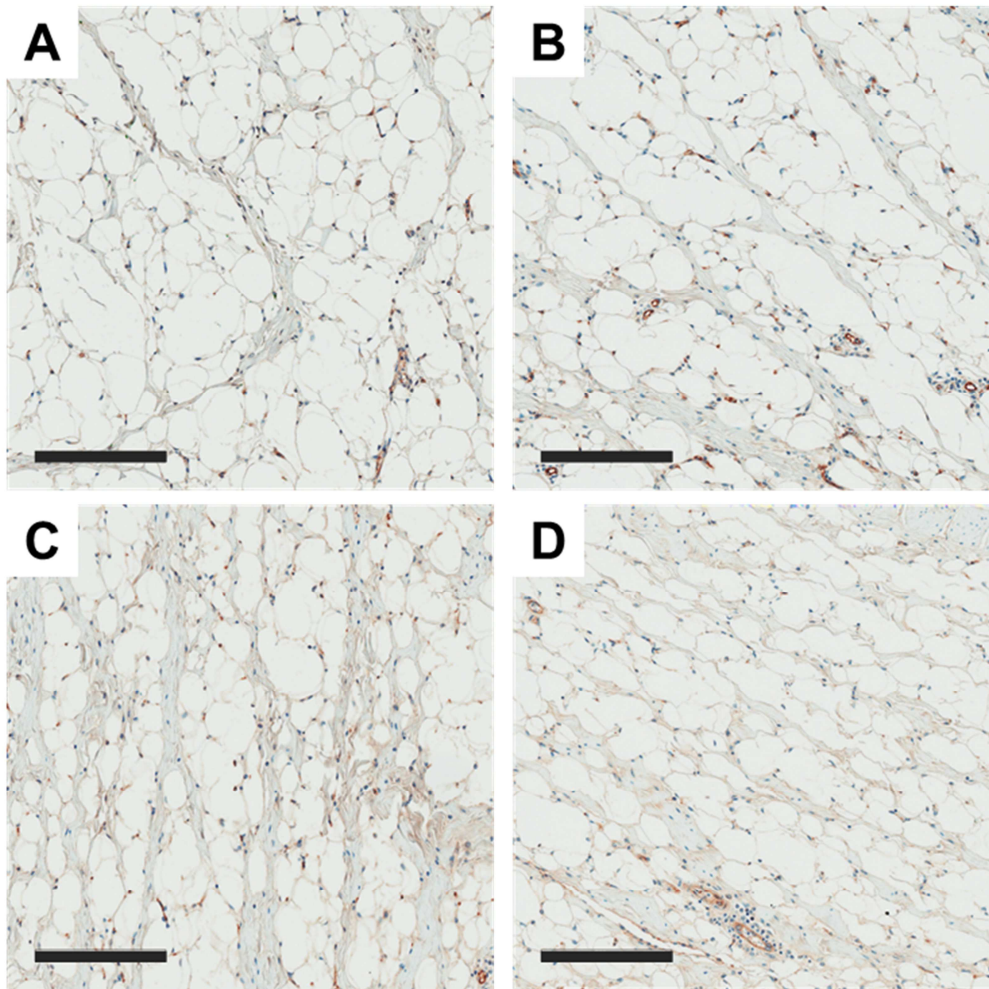

**Figure S5.** Photomicrographs anti-CD31 and hematoxylin stained tissues >10 mm away from DET/NO (A,C) and DET Control (B,D) implants in healthy (A,B) and diabetic (C,D) pigs. These tissue regions represent of unperturbed subcutaneous tissue. The scale bar at the bottom-left corner of each image represents a distance of 200  $\mu\text{m}$ .

**Table S1.** Characterization of NO donor-modified silica nanoparticles.<sup>a</sup>

| <b>NO Donor Modification</b>     | <b>Particle Diameter<sup>b</sup> (μm)</b> | <b>[NO]<sub>t</sub> (μmol mg<sup>-1</sup>)</b> | <b>t<sub>1/2</sub> (min)</b> |
|----------------------------------|-------------------------------------------|------------------------------------------------|------------------------------|
| <i>S</i> -nitrosothiol (RSNO)    | 1.76±0.07                                 | 2.29±0.47                                      | 128.8±2.3                    |
| <i>N</i> -diazoniumdiolate (DET) | 0.87±0.17                                 | 1.61±0.17                                      | 35.7±7.5                     |

<sup>a</sup>Results are expressed as average values ± standard deviation of n≥3 separate experiments.<sup>b</sup>Geometric particle diameter estimated via scanning electron microscopy.<sup>c</sup>Total NO storage per mg of particles.<sup>d</sup>Half-life of NO release.
